# Supplementary material for: Immunogenicity and safety of two-dose SARS-CoV-2 vaccination via different platforms in kidney transplantation recipients
Source: PubMed Central journal article supplement (PMC9523367; doi:10.3389/fimmu.2022.951576), 2022-09-16

**Supplemental Figure 1.** Correlation between antibody (anti-S) levels and T lymphocytes: (A) total T cell count; (B) CD4+ T cell counts; (C) CD8+ T cell counts; (D) ratio of CD4+ T cell count/CD8+ T cell count

**Supplemental Figure 1A**

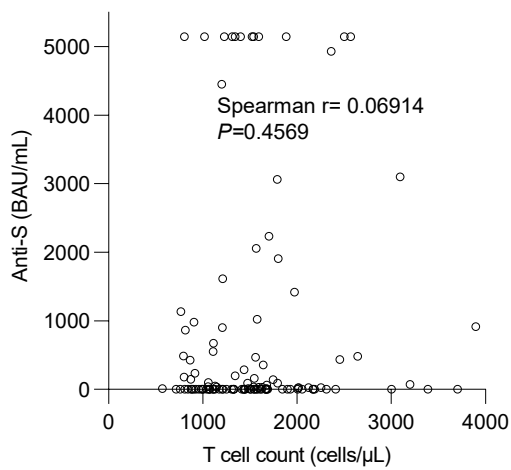

**Supplemental Figure 1B**

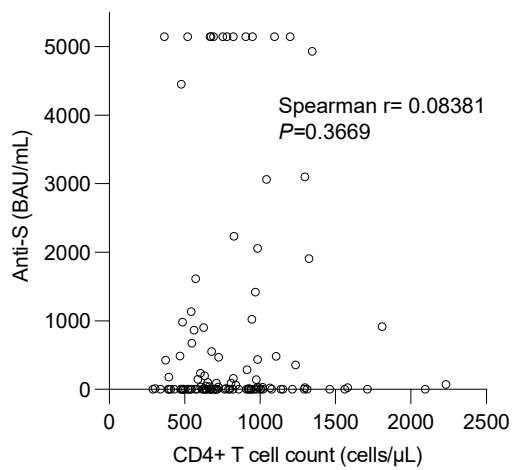

**Supplemental Figure 1C**

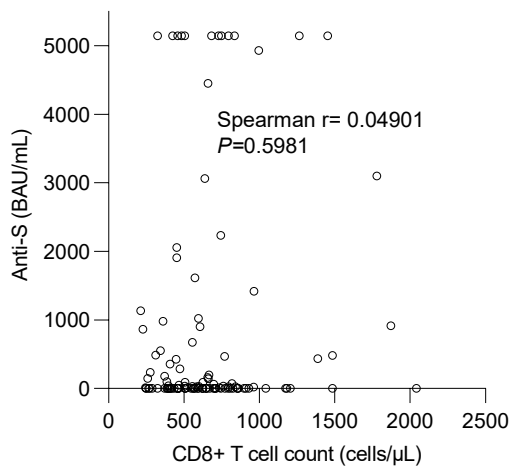

**Supplemental Figure 1D**

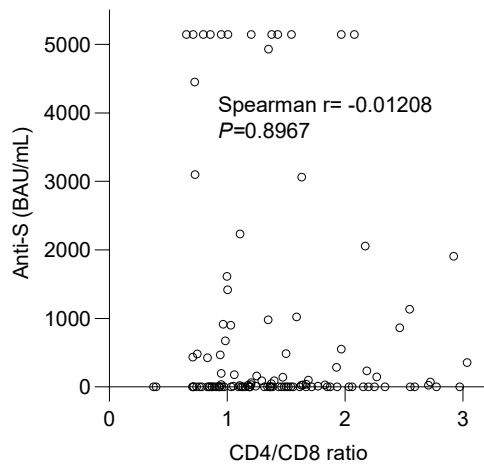

**Supplemental Figure 2.** Correlation between IFN- $\gamma$  level and lymphocytes: (A) total T cell count; (B) CD4+ T cell counts; (C) CD8+ T cell counts; (D) ratio of CD4+ T cell count/CD8+ T cell count

**Supplemental Figure 2A**

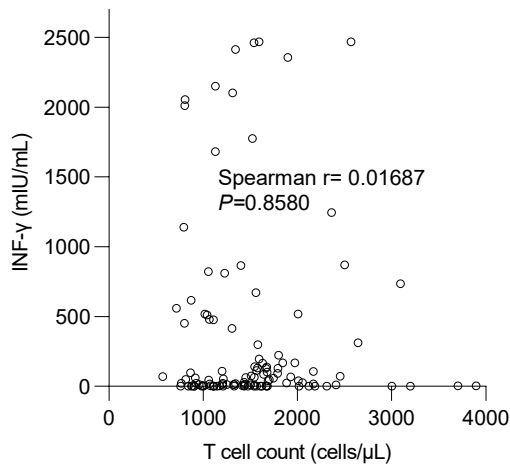

**Supplemental Figure 2B**

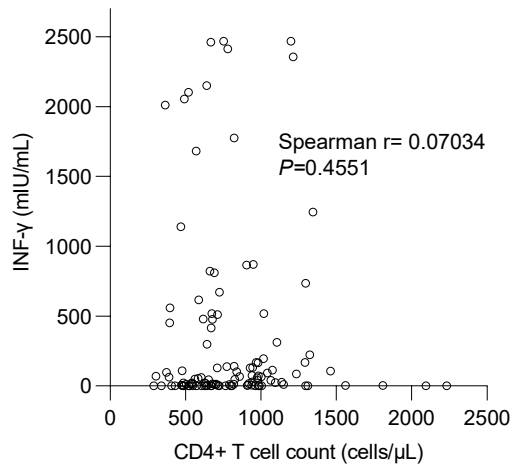

**Supplemental Figure 2C**

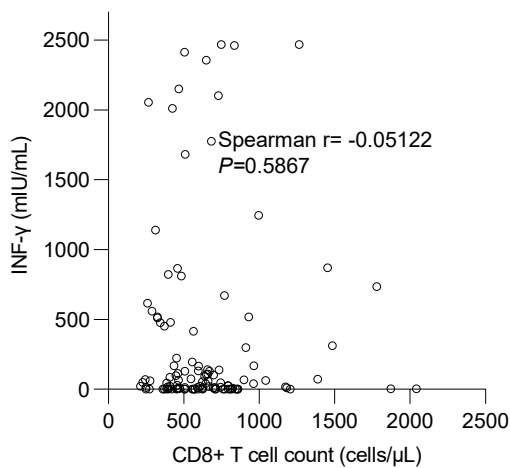

**Supplemental Figure 2D**

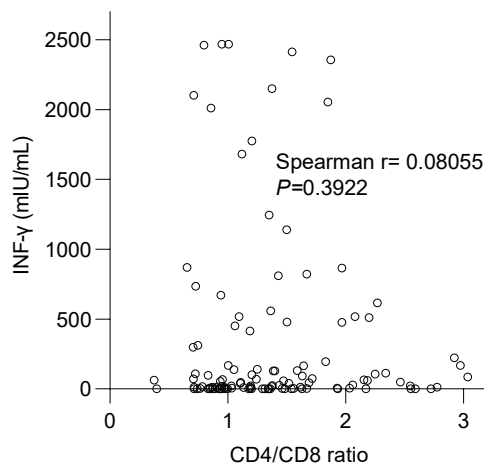

Supplement: Image_1.pdf [file Image_1.pdf]
